# Supplementary material for: Photoluminescence color stability of green-emitting InP/ZnS core/shell quantum dots embedded in silica prepared via hydrophobic routes
Source: Royal Society of Chemistry journal article supplement (doi:10.1039/c8ra04830d), 2018-01-01
Supplement: c8ra04830d1.pdf [file c8ra04830d1.pdf]

## Electronic Supplementary Information

*RSC Advances*

### **Photoluminescence color stability of Greene-emitting InP/ZnS core/shell quantum dots embedded in silica prepared via hydrophobic routes**

Taichi Watanabe,<sup>a</sup> Yoshiki Iso,<sup>\*a</sup> Tetsuhiko Isobe<sup>\*a</sup> and Hirokazu Sasaki<sup>b</sup>

*<sup>a</sup>Department of Applied Chemistry, Faculty of Science and Technology, Keio University,*

*3-14-1 Hiyoshi, Kohoku-ku, Yokohama 223-8522, Japan*

*<sup>b</sup>SHOEI CHEMICAL INC., 2-1-1 Nishi-Shinjuku, Shinjuku-ku, Tokyo 163-0443, Japan*

\*Corresponding Authors

E-mail address: iso@aplc.keio.ac.jp (Y.I.), isobe@aplc.keio.ac.jp (T.I.);

Tel: +81 45 566 1558 (Y.I.), +81 45 566 1554 (T.I.); Fax: + 81 45 566 1551

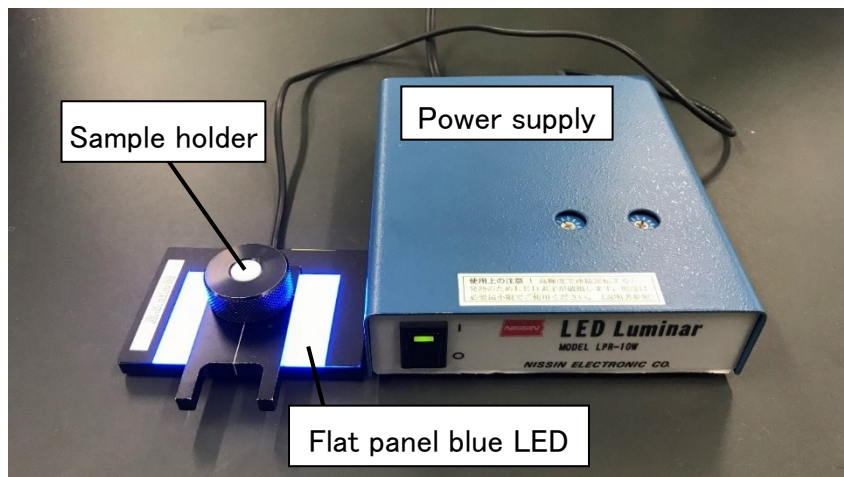

**Fig. S1** Photograph showing blue light irradiation of a sample. The actual experiment was performed in the dark.

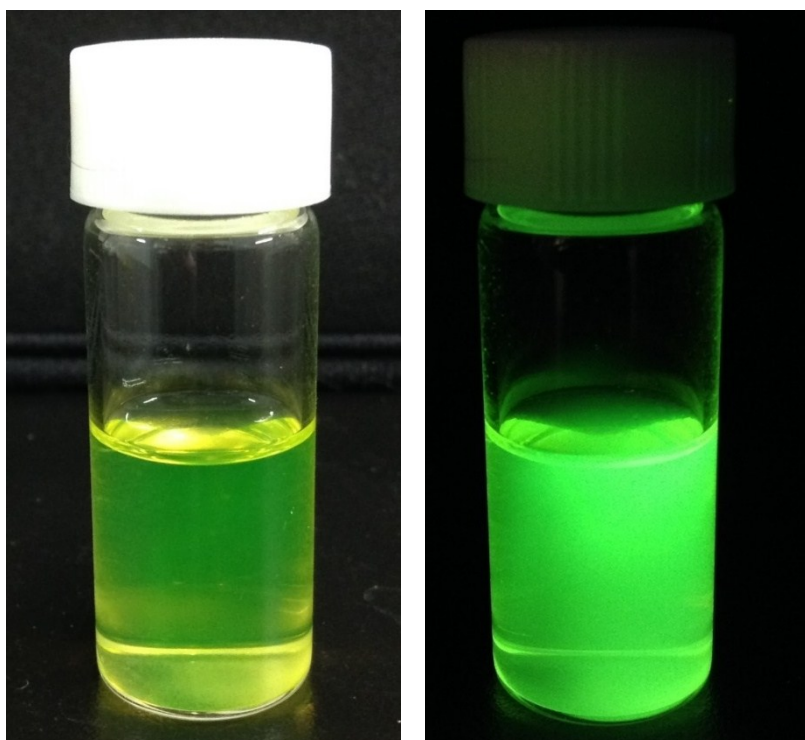

**Fig. S2** Photographs of TEOS dispersion of InP/ZnS QDs at  $9.3 \text{ mg mL}^{-1}$  under (left) white light and (right) 365-nm near-UV light. The images were captured immediately after mixing.

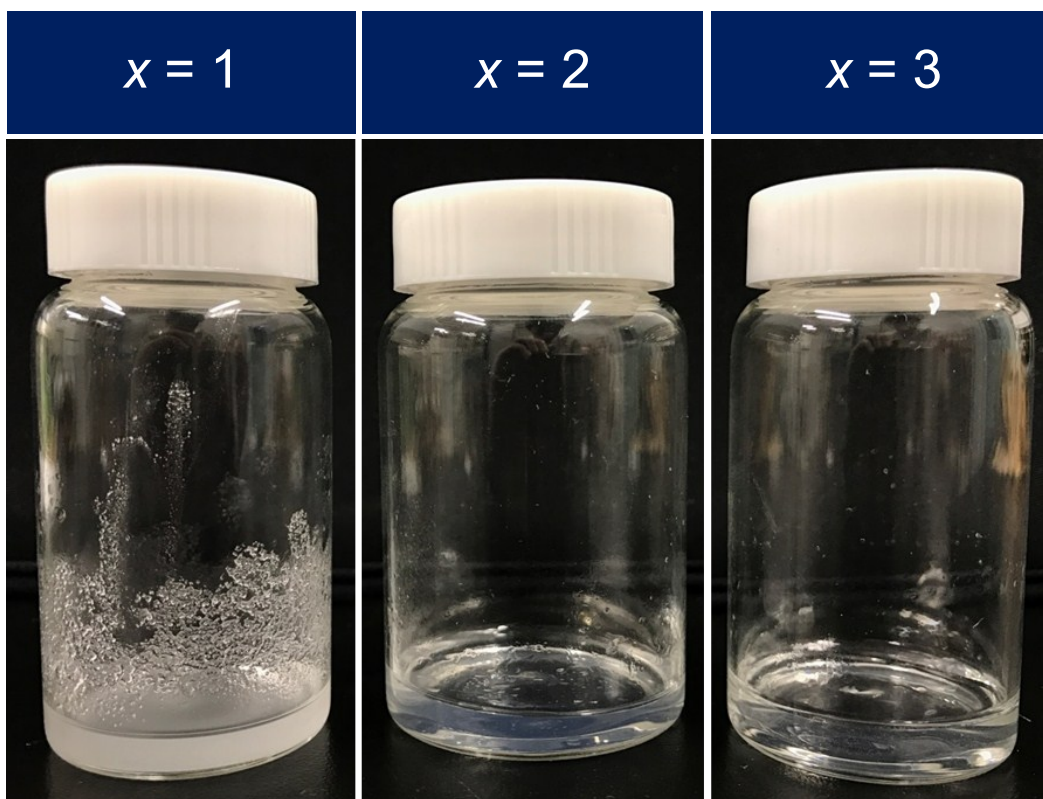

**Fig. S3** Photographs of mixtures of TEOS (3 mL) and lactic acid ( $x$  mL) after gelation.

**Table S1** Detailed values of the color coordinates plotted in Figs. 3 and 8.

|        |     | Color coordinate |
|--------|-----|------------------|
| Fig. 3 | (a) | (0.2438, 0.6830) |
|        | (b) | (0.2500, 0.6747) |
|        | (c) | (0.3198, 0.6239) |
| Fig. 8 | (a) | (0.2333, 0.6916) |
|        | (b) | (0.2225, 0.6957) |
|        | (c) | (0.2221, 0.6941) |

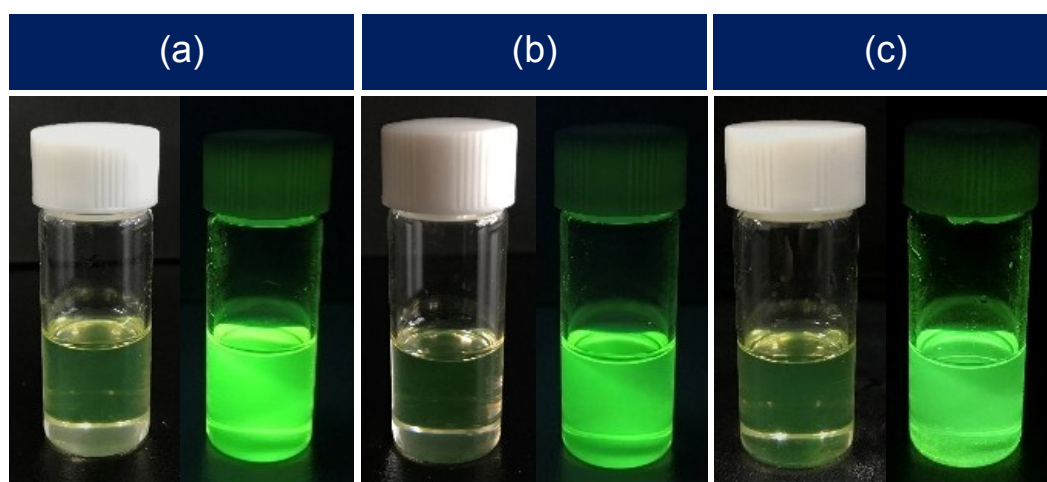

**Fig. S4** Photographs of  $0.5\text{-mg mL}^{-1}$  toluene dispersions of (a) as-received InP/ZnS QDs, (b) TMOS-modified InP/ZnS QDs (20 h), and (c) TMOS-modified InP/ZnS QDs (7 d) under (left) white light and (right) 365-nm UV light.

**Table S2** PLQYs of toluene dispersions of the as-received InP/ZnS QDs without TMOS

after stirring for a certain time.  $\lambda_{\text{ex}} = 468.3$  nm.

| Stirring duration              | QY (%) |
|--------------------------------|--------|
| (Immediately after dispersion) | 67     |
| 20 h                           | 61     |
| 7 days                         | 55     |

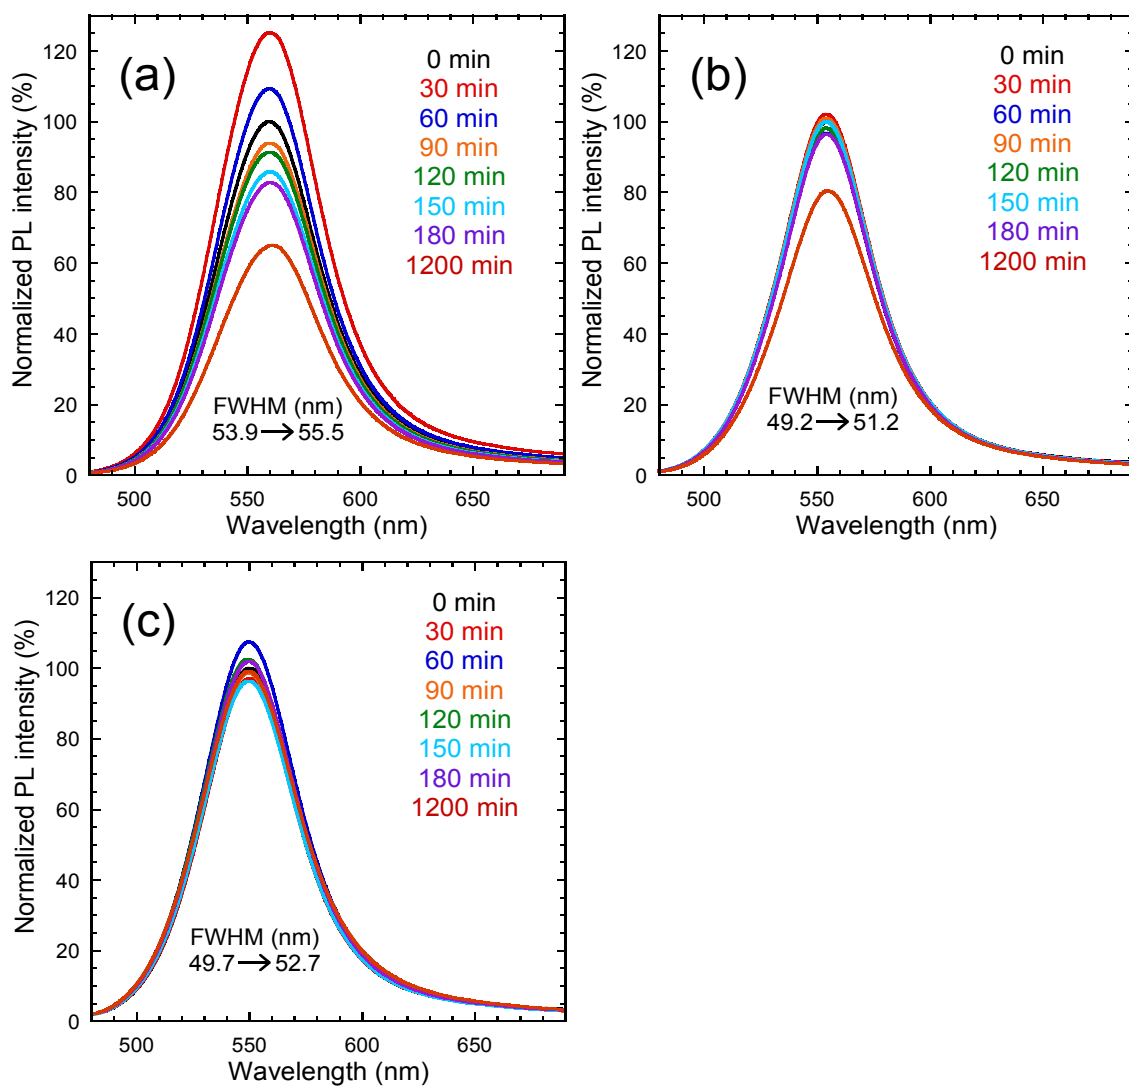

**Fig. S5** Changes in the PL spectra under continuous irradiation by the flat panel blue LED. (a) As-received InP/ZnS QDs, (b) TMOS-modified InP/ZnS QDs (20 h), and (c) TMOS-modified InP/ZnS QDs (7d).  $\lambda_{\text{ex}} = 468.3$  nm.
